# Supplementary material for: CoS2nanoparticles–graphene hybrid as a cathode catalyst for aprotic Li–O2batteries
Source: Royal Society of Chemistry journal article supplement (doi:10.1039/c6ra00723f), 2016-01-01
Supplement: c6ra00723f1.pdf [file c6ra00723f1.pdf]

## Electronic Supplementary Information for

# CoS<sub>2</sub> Nanoparticles–Graphene Hybrid as Cathodes Catalysts for Aprotic Li-O<sub>2</sub> Batteries

Zhiyang Lyu,<sup>a</sup> Jian Zhang,<sup>a</sup> Liangjun Wang,<sup>b</sup> Kaidi Yuan,<sup>b</sup> Yanping Luan,<sup>a</sup> Peng Xiao,<sup>a</sup> and Wei Chen<sup>a,b,c,\*</sup>

<sup>a</sup>Department of Chemistry, National University of Singapore, 3 Science Drive 3, 117543, Singapore

<sup>b</sup>Department of Physics, National University of Singapore, 2 Science Drive 3, 117543, Singapore

<sup>c</sup>National University of Singapore (Suzhou) Research Institute, Suzhou, China.

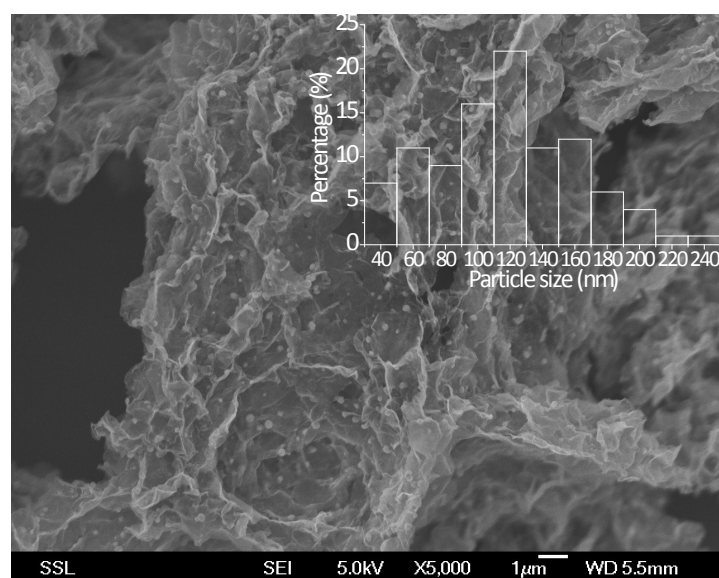

**Fig. S1** Low-resolution SEM image of CoS<sub>2</sub>/RGO hybrid and the corresponding particle size distribution in the inset.

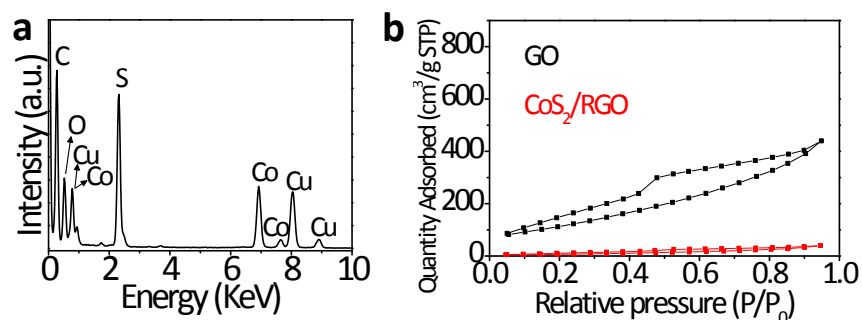

**Fig. S2** EDX spectra (a) and N<sub>2</sub> adsorption/desorption isotherms (b) of the CoS<sub>2</sub>/RGO hybrid. In (b), the N<sub>2</sub> adsorption/desorption isotherms of the RGO was also presented.

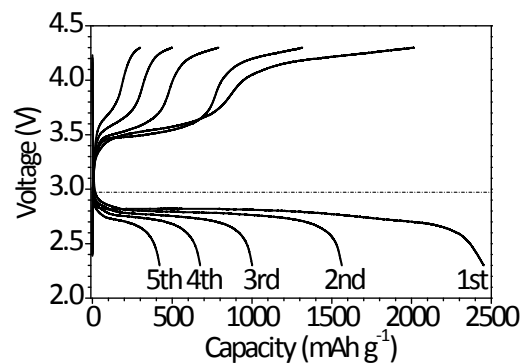

**Fig. S3** Full discharge–charge curves of the Li-O<sub>2</sub> cell with CoS<sub>2</sub>/RGO cathode and LiClO<sub>4</sub>-DMSO electrolyte at a current density of 0.1 A g<sup>-1</sup>.

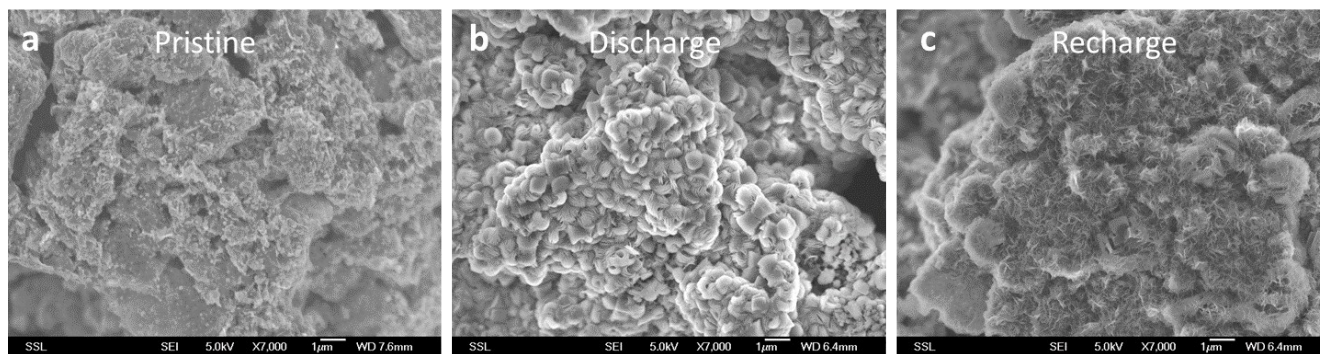

**Fig. S4** Low-resolution SEM images for the pristine electrode (a), after discharge (b) and after recharge (c) for clear comparison at the 0.1 A g<sup>-1</sup> rate and first full discharge-charge states.

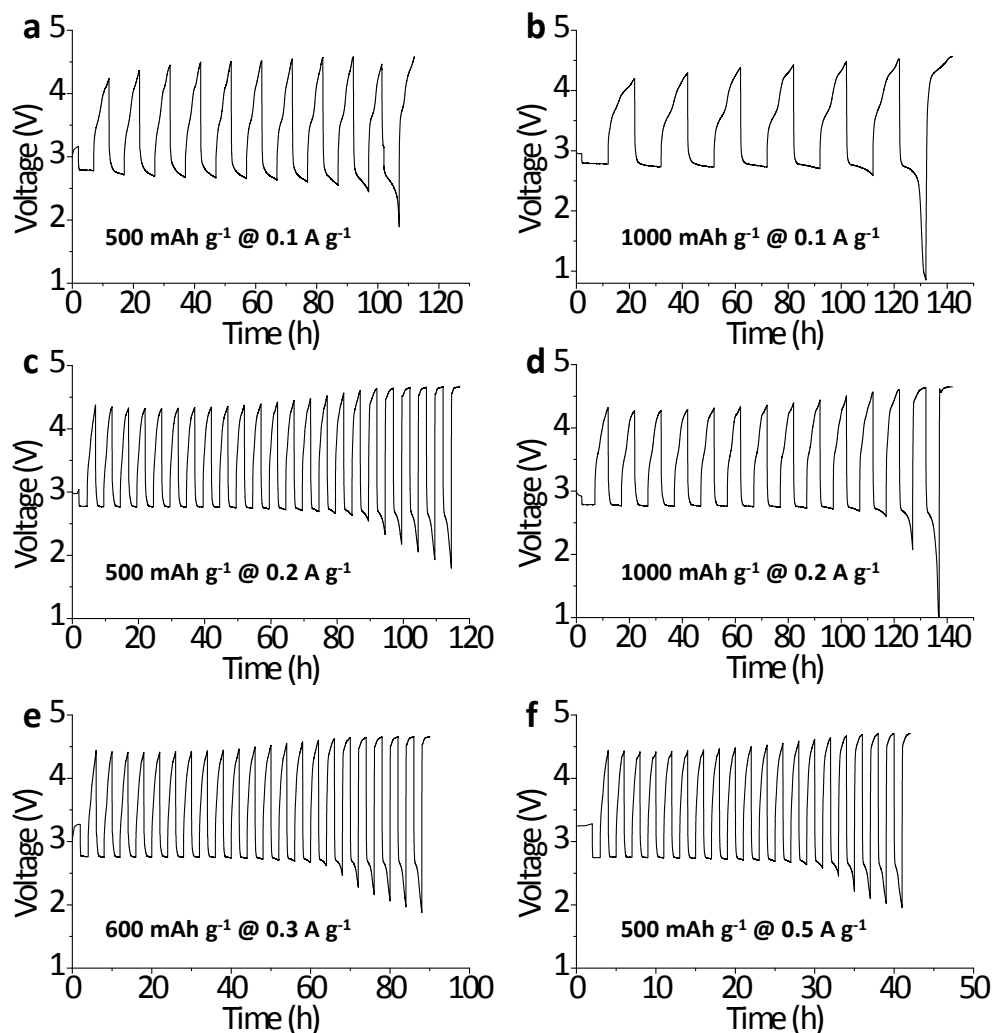

**Fig. S5** The performances of the Li-O<sub>2</sub> cells with CoS<sub>2</sub>/RGO hybrid cathodes and LiClO<sub>4</sub>-DMSO electrolytes at different current densities (A g<sup>-1</sup>) and different limited capacities. (a) 500 mAh g<sup>-1</sup> @ 0.1 A g<sup>-1</sup>. (b) 1000 mAh g<sup>-1</sup> @ 0.1 A g<sup>-1</sup>. (c) 500 mAh g<sup>-1</sup> @ 0.2 A g<sup>-1</sup>. (d) 1000 mAh g<sup>-1</sup> @ 0.2 A g<sup>-1</sup>. (e) 600 mAh g<sup>-1</sup> @ 0.3 A g<sup>-1</sup>. (f) 500 mAh g<sup>-1</sup> @ 0.5 A g<sup>-1</sup>.

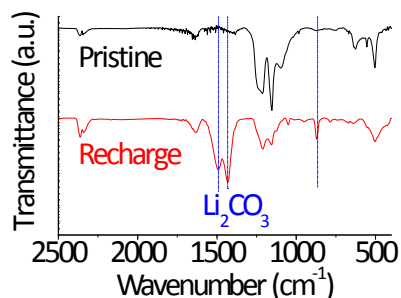

**Fig. S6** FTIR spectrum of CoS<sub>2</sub>/RGO hybrid at pristine and after 10<sup>th</sup> charge states.

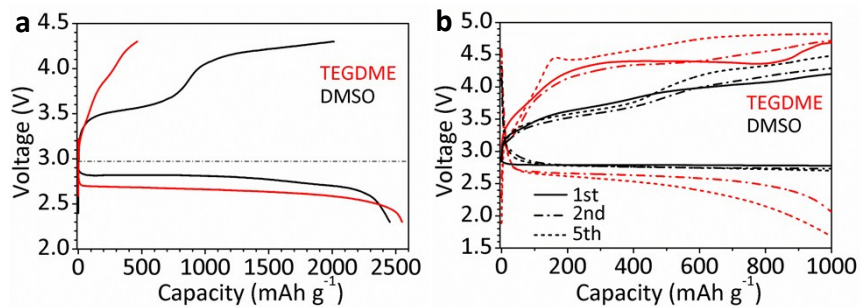

**Fig. S7** The performances of the Li-O<sub>2</sub> cells with CoS<sub>2</sub>/RGO cathodes and LiCF<sub>3</sub>SO<sub>3</sub>-TEGDME electrolytes in comparison with those of the LiClO<sub>4</sub>-DMSO electrolytes based Li-O<sub>2</sub> cells. (a) First full discharge-charge curves at the rate of 0.1 A g<sup>-1</sup>. (b) Discharge-charge curves at the rate of 0.1 A g<sup>-1</sup> and a limited capacity of 500 mAh g<sup>-1</sup>.

In comparison with the LiClO<sub>4</sub>-DMSO electrolyte based Li-O<sub>2</sub> cell, the Li-O<sub>2</sub> cell with LiCF<sub>3</sub>SO<sub>3</sub>-TEGDME electrolyte demonstrated a higher ORR overpotential (~0.28 V) upon discharge at a current density of 0.1 A g<sup>-1</sup> (Fig. S7a). Especially, no obvious charge platform was observed and a small charge capacity was obtained. This meant that the cell with LiCF<sub>3</sub>SO<sub>3</sub>-TEGDME electrolyte owned a very weak capability of oxidizing the Li<sub>2</sub>O<sub>2</sub> upon charge, leading the lower round-trip efficiency (the ratio of discharge to charge voltage). As a result, the cycle stability was also unsatisfied (Fig. S7b).
